# Supplementary material for: Active vs. Passive Thermal Imaging for Helping the Early Detection of Soil-Borne Rot Diseases on Wild Rocket [Diplotaxis tenuifolia (L.) D.C.]
Source: MDPI journal article supplement (doi:10.3390/plants12081615), 2023-04-11
Supplement: s1 [file s1]

## Supplementary Data

# Active Vs Passive thermal imaging for helping the early detection of soil-borne diseases on wild rocket salad crop caused by *Rhizoctonia solani* Kühn and *Sclerotinia sclerotiorum* (Lib.) de Bary

Massimo Rippa<sup>1,\*</sup>, Andrea Pasqualini<sup>2</sup>, Rossella Curcio<sup>1</sup>, Pasquale Mormile<sup>1</sup>, Catello Pane<sup>2</sup>

<sup>1</sup> Institute of Applied Sciences and Intelligent System "E. Caianiello" of CNR, 80078 Pozzuoli (Na), Italy

<sup>2</sup> Consiglio per la Ricerca in Agricoltura e l'Analisi dell'Economia Agraria, Centro di Ricerca Orticoltura e Florovivaismo, via Cavaleggeri, 25, 84098 Pontecagnano Faiano, Italy

\* Correspondence: [m.rippa@isasi.cnr.it](mailto:m.rippa@isasi.cnr.it)

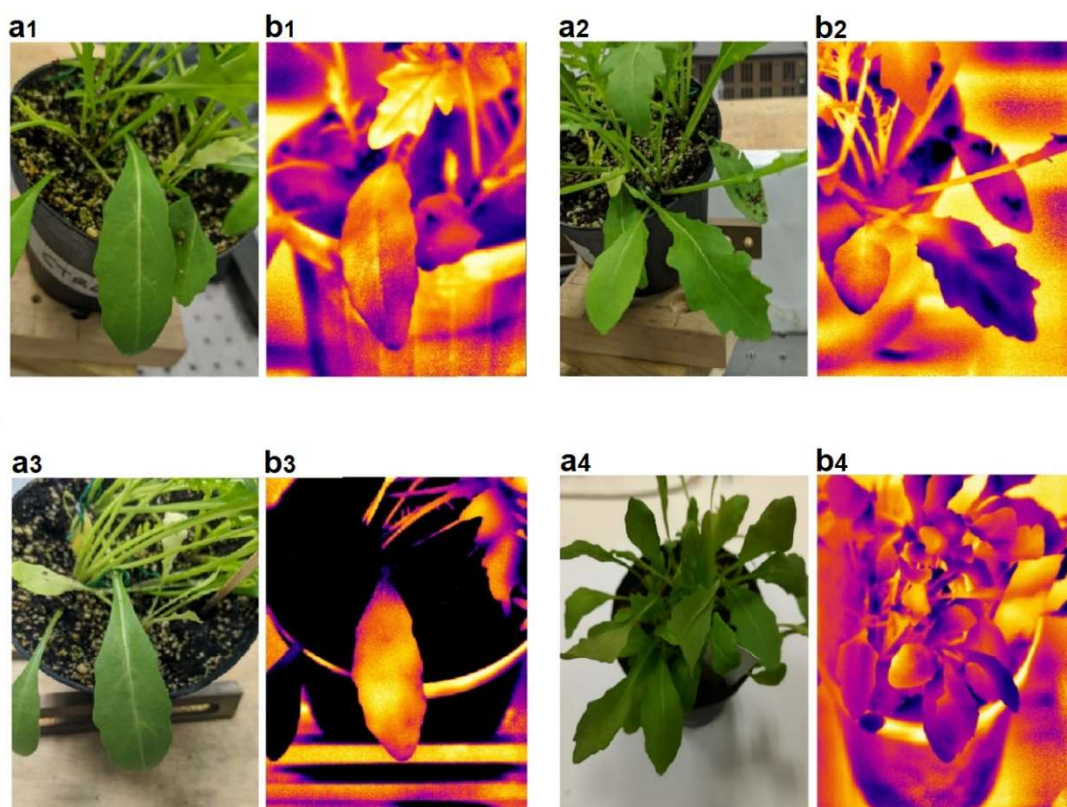

**Figure S1.** Examples of active thermography analysis for uninoculated control leaves of rocket plants: a) visible images and b) post-processed thermal images.

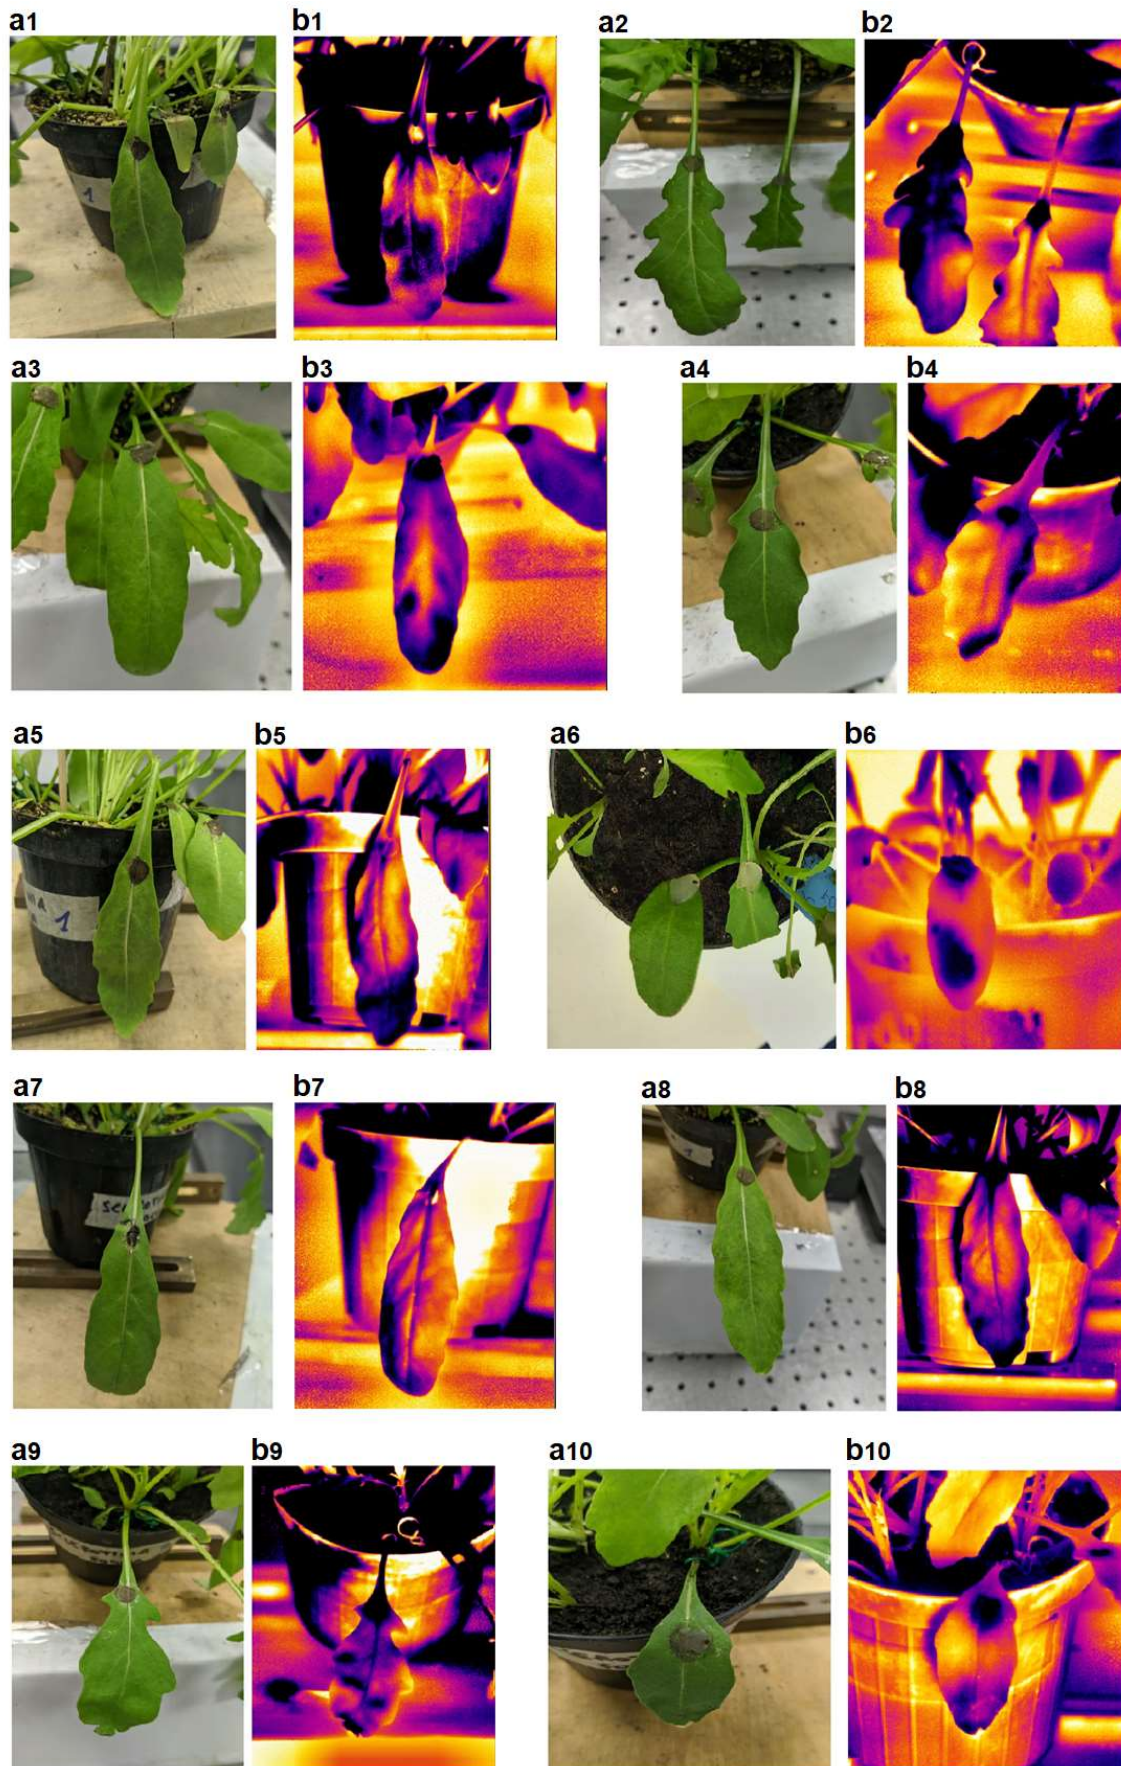

**Figure S2.** Examples of active thermography analysis of rocket plants inoculated with *S. sclerotiorum* on leaves (T1): a) visible images and b) post-processed thermal images.



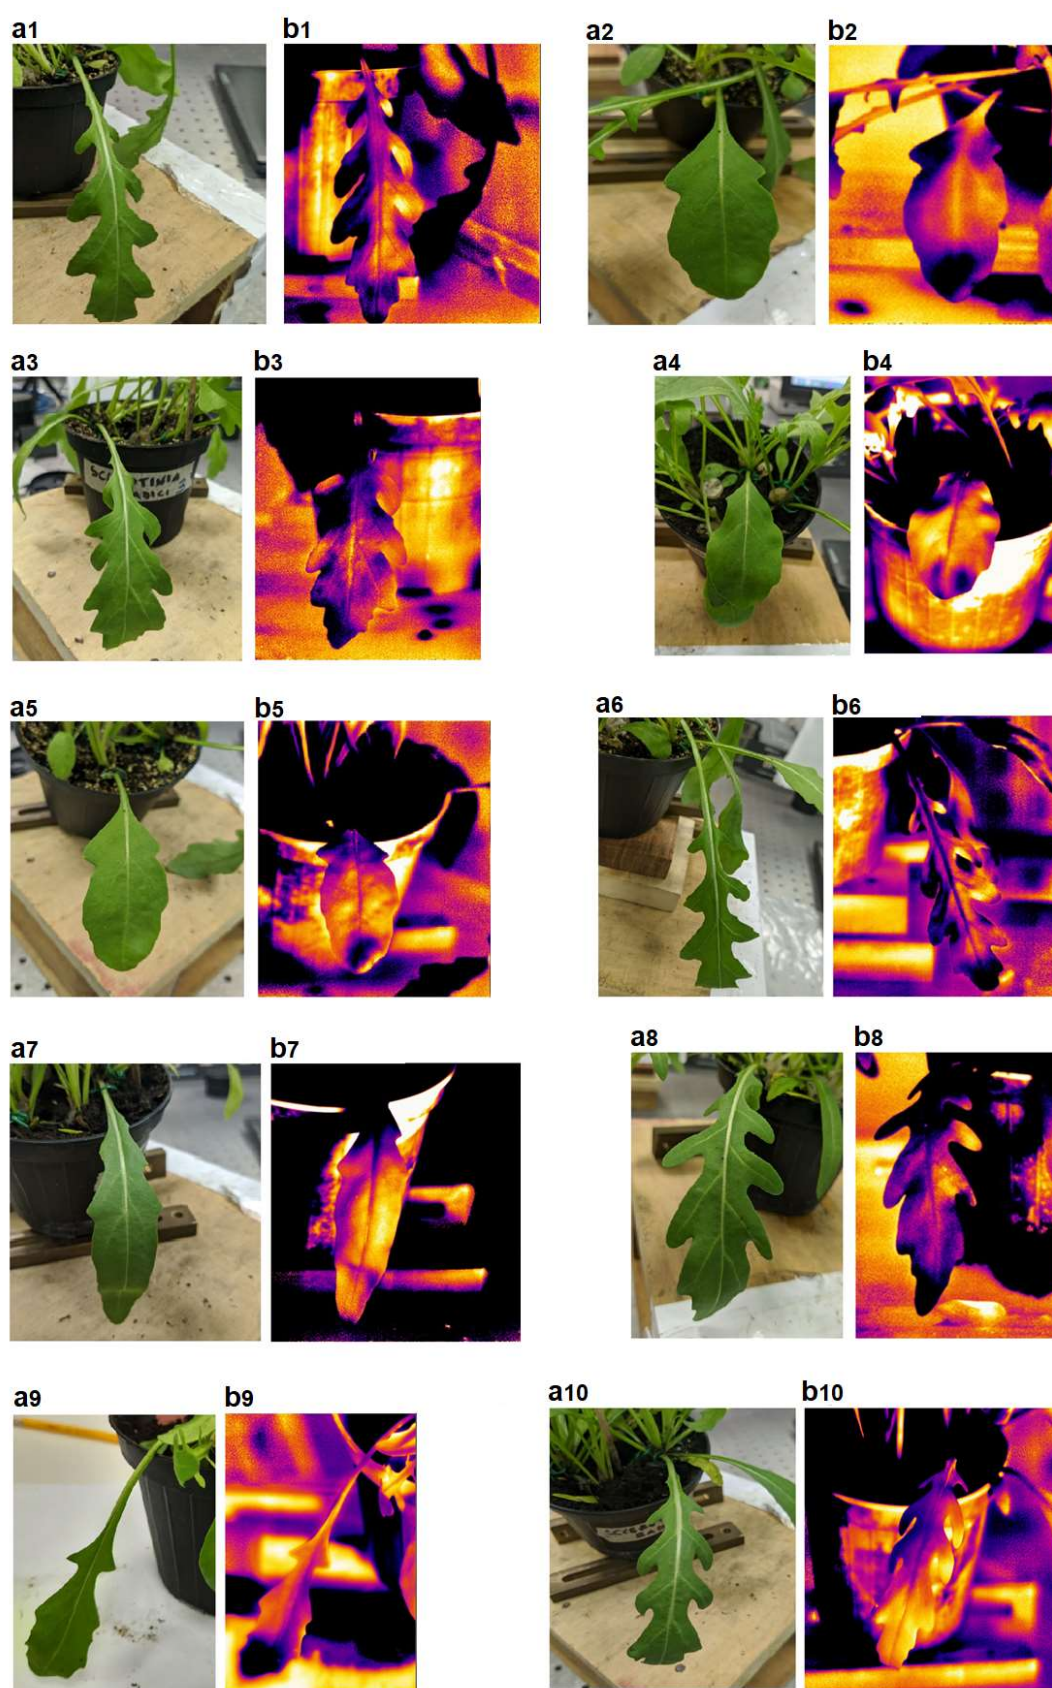

**Figure S3.** Examples of active thermography analysis of rocket plants inoculated with *S. sclerotiorum* on collars (T2): a) visible images and b) post-processed thermal images.

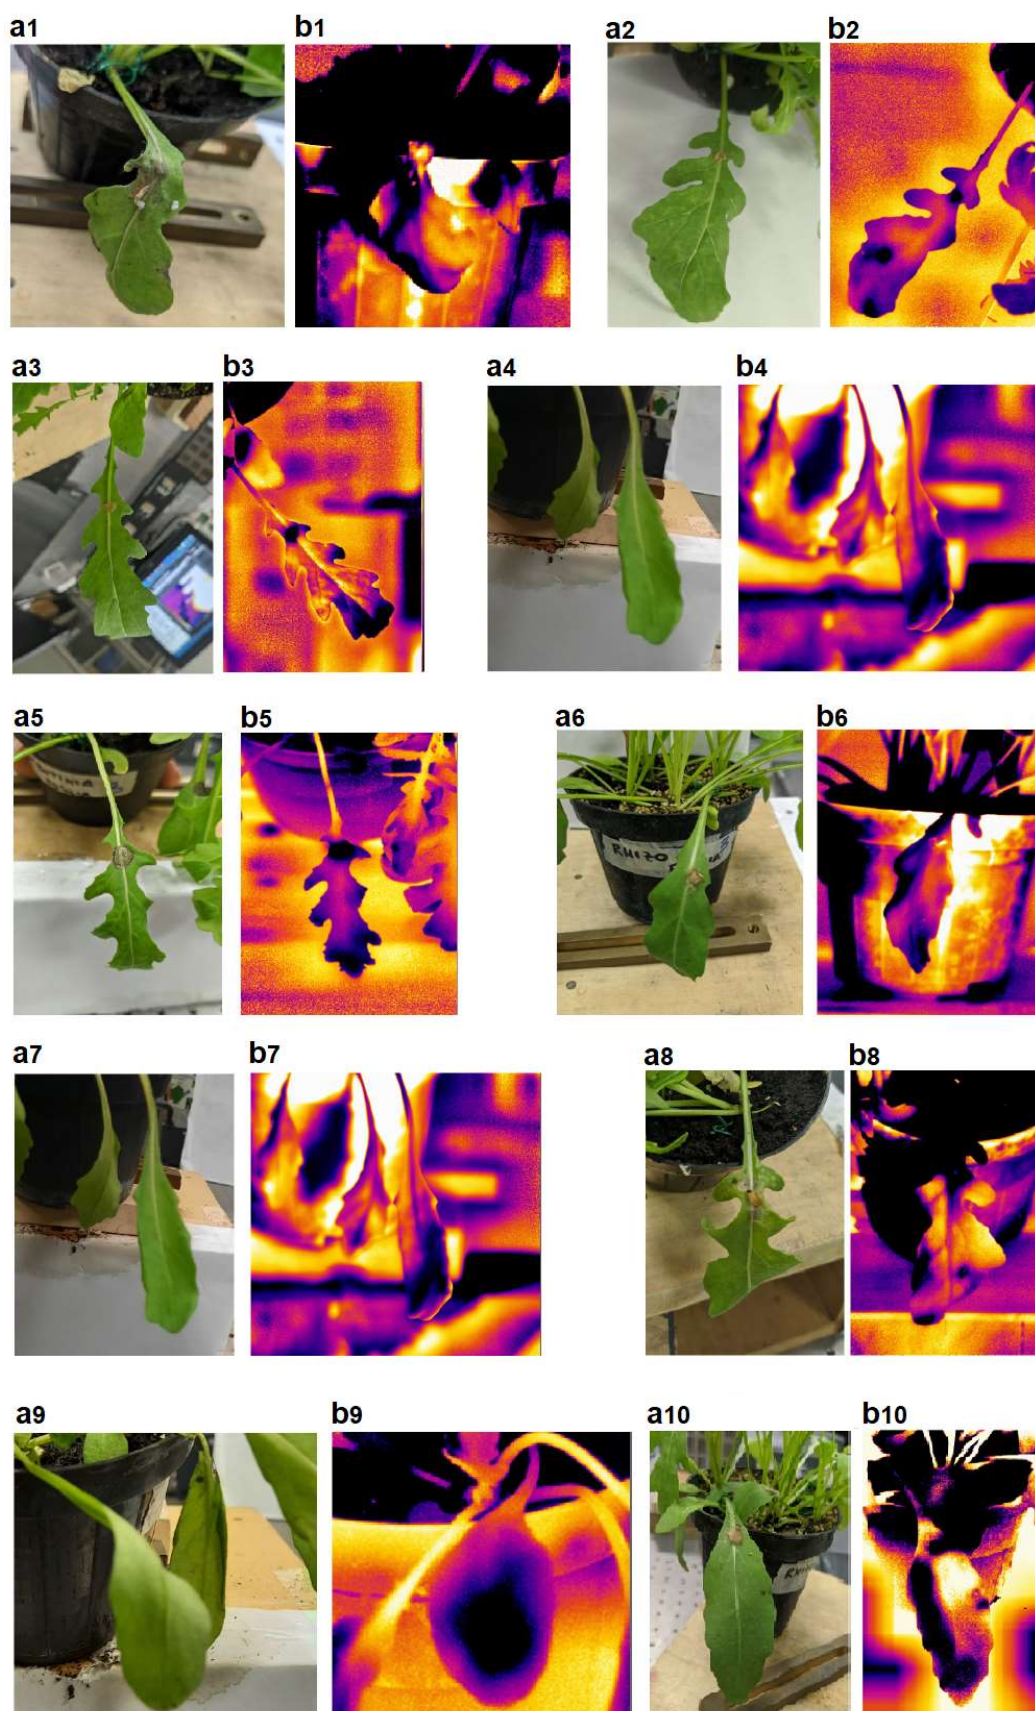

**Figure S4.** Examples of active thermography analysis of rocket plants inoculated with *R. solani* on leaves (T3): a) visible images and b) post-processed thermal images.



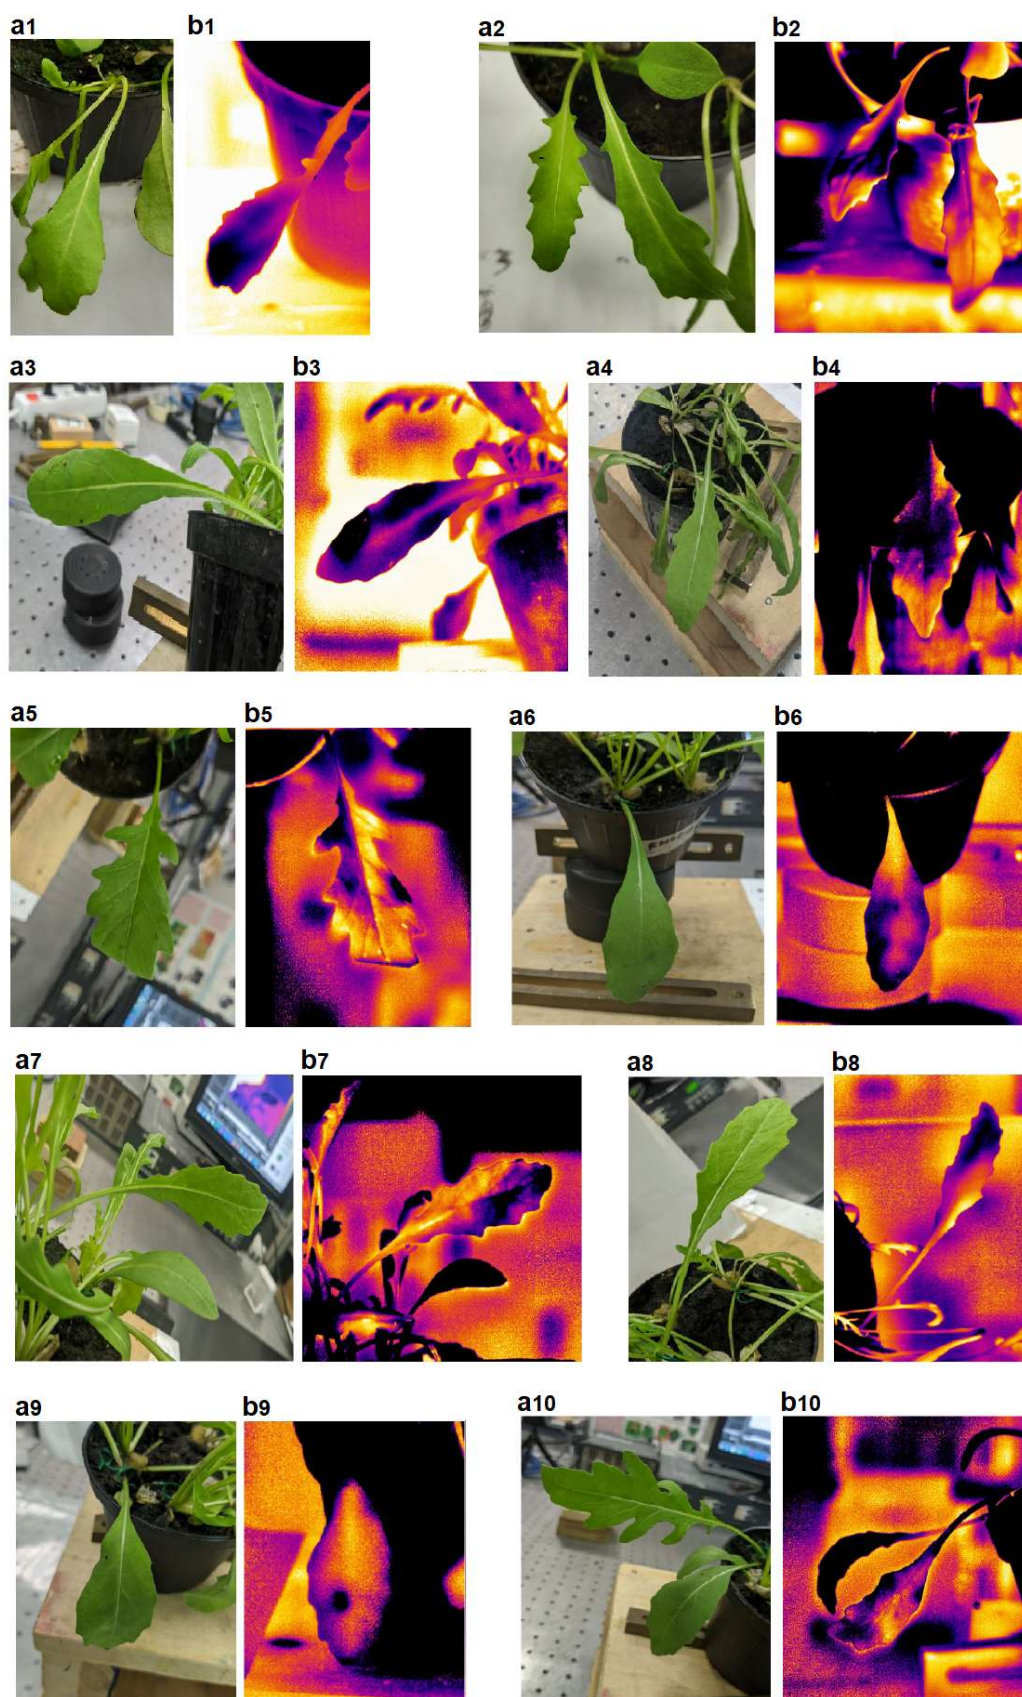

**Figure S5.** Examples of active thermography analysis of rocket plants inoculated with *R. solani* on collars (T4): a) visible images and b) post-processed thermal images.

**Right prevision (RP%) calculation:**

$$RP\% = \frac{\sum_i^4 TP_i + TN}{5} = \frac{72.5 + 87.5 + 77.5 + 90.0 + 92.5}{5} = 84$$

Where  $TP_i$  are the True Positive found in the treatments T1, T2, T3 and T4 and  $TN$  the True Negative found for not inoculated plants T5.
